# Supplementary material for: Synthesizing Stakeholders Perspectives on Online Psychological Interventions to Improve the Mental Health of the Italian Population during the COVID-19 Pandemic: An Online Survey Study
Source: MDPI journal article supplement (doi:10.3390/ijerph19127008), 2022-06-08
Supplement: s1 [file s1]

Table S1 – Characteristics and baseline information of the sample

|                                                            | <i>n</i> | <i>%</i> |
|------------------------------------------------------------|----------|----------|
| <b>Gender</b>                                              |          |          |
| Male                                                       | 309      | 30.2     |
| Female                                                     | 715      | 69.8     |
| <b>Age (range)</b>                                         |          |          |
| Young adults (18-40)                                       | 553      | 54.2     |
| Adults (41-65)                                             | 388      | 38.0     |
| Elderly (66-89)                                            | 79       | 7.7      |
| <b>Education</b>                                           |          |          |
| Primary School                                             | 8        | 0.8      |
| Middle School                                              | 118      | 11.6     |
| High School                                                | 290      | 28.3     |
| Degree                                                     | 431      | 42.1     |
| Master                                                     | 92       | 9.0      |
| Ph.D.                                                      | 84       | 8.2      |
| <b>Job position (before the COVID-19 pandemic)</b>         |          |          |
| Student                                                    | 140      | 13.7     |
| Part-time employee                                         | 108      | 10.6     |
| Full-time employee                                         | 396      | 38.7     |
| Freelance                                                  | 240      | 23.4     |
| Housewife                                                  | 40       | 3.9      |
| Unemployed                                                 | 28       | 2.7      |
| Retired                                                    | 72       | 7.0      |
| <b>Change in job position due to the COVID-19 pandemic</b> |          |          |
| Yes                                                        | 243      | 23.7     |
| No                                                         | 777      | 75.9     |
| Missed                                                     | 4        | 0.4      |
| <b>Current job position</b>                                |          |          |
| Unchanged                                                  | 181      | 17.7     |
| Smart working/Distance learning                            | 341      | 33.3     |

|                                                 |     |      |
|-------------------------------------------------|-----|------|
| Layoffs                                         | 60  | 5.9  |
| Discontinued activity (if owner)                | 16  | 1.6  |
| Unemployed                                      | 100 | 9.8  |
| Retired                                         | 80  | 7.8  |
| Mixed mode (from home and in presence)          | 68  | 6.7  |
| Maternity                                       | 33  | 3.2  |
| Reduction of working hours                      | 20  | 2.0  |
| Missed                                          | 124 | 12.0 |
| <hr/> <b>Infected by the virus</b>              |     |      |
| Yes                                             | 144 | 14.1 |
| No                                              | 880 | 85.9 |
| <hr/> <b>Loved one(s) infected by the virus</b> |     |      |
| Yes                                             | 555 | 54.2 |
| No                                              | 469 | 45.8 |
